# Supplementary material for: Open access for the non-English-speaking world: overcoming the language barrier
Source: PubMed Central journal article supplement (PMC2268932; doi:10.1186/1742-7622-5-1), 2008-01-04
Supplement: 1742-7622-5-1-S3.pdf [file 1742-7622-5-1-S3.pdf]

Simplified Chinese / 简体中文

编者语

为非英语世界提供公开取阅：克服语言障碍

作者：冯俊熙 (Isaac Chun-Hai FUNG)

综述

这篇编者语指出了在近年来公开取阅运动的成功下，科学交流仍然存在着语言障碍。四种克服语言障碍的可行方案被提出来供各英文期刊参考：1) 由作者提供综述的其他语言版本，2) 以维基方式公开让人翻译，3) 国际性的翻译编辑委员会，和4) 期刊的其他语言版本。《流行病学中的新近主题》(*Emerging Themes in Epidemiology*) 宣布：由即日起，它将会接受作者以附加档案的形式，提供综述或全文翻译。
