# Supplementary material for: Open access for the non-English-speaking world: overcoming the language barrier
Source: PubMed Central journal article supplement (PMC2268932; doi:10.1186/1742-7622-5-1), 2008-01-04
Supplement: 1742-7622-5-1-S12.pdf [file 1742-7622-5-1-S12.pdf]

Irish / Gaeilge

Eagarfhocal (*editorial*)

## **Open Access dóibh siúd nach labhraíonn Béarla : Ag sárú constacaí teangeolaíochta**

Úadar: Isaac Chun-Hai FUNG

Achomaireacht (*abstract*)

In anneoin dul chun cinn an “Open Access Movement”, tugann an t-eagarfhocal seo ‘súil eile’ dúinn ar fhadbhanna agus ar chonstacaí teangeolaíochta a bhaineann le cumarsáid eolaíochta. Tá ceithre rogha molta ag irisí Béarla chun bacanna teanga a shárú:

- 1) achomairí i dteangacha eile léirithe ag na húdair,
- 2) aistriúchán oscailte “Wiki”
- 3) bord idirnáisiúnta d’eagarthóirí-aistreoirí
- 4) leagan an iris i dteanga eile

Fógraíodh “Emerging themes in Epidemiology”, go nglacfaí láithreach le haistriúcháin na n-achomairí ó théacasanna iomlána údar, mar chomhaid breise.
