# Supplementary material for: Open access for the non-English-speaking world: overcoming the language barrier
Source: PubMed Central journal article supplement (PMC2268932; doi:10.1186/1742-7622-5-1), 2008-01-04
Supplement: 1742-7622-5-1-S17.pdf [file 1742-7622-5-1-S17.pdf]

Malay / Bahasa Melayu

Editorial

**Akses terbuka untuk dunia bukan berbahasa Inggeris: Mengatasi batasan bahasa.**

Pengarang: Isaac Chun-Hai FUNG

Abstrak

Editorial ini menekankan tentang masalah batasan bahasa dalam komunikasi saintifik di sebalik kejayaan Gerakan Akses Terbuka akhir-akhir ini. Empat pilihan untuk jurnal-jurnal bahasa Inggeris bagi mengatasi batasan bahasa disarankan:

- 1) abstrak dalam bahasa-bahasa alternatif disediakan oleh para penulis,
- 2) terjemahan terbuka Wiki,
- 3) lembaga penterjemah-editor antarabangsa, dan
- 4) jurnal versi bahasa alternative.

Emerging Themes in Epidemiology mengumumkan akan menerima terjemahan abstrak-abstrak atau teks-teks penuh oleh para penulis sebagai fail tambahan dengan serta merta.
